# Supplementary material for: A crosstalk between gut and brain in sepsis-induced cognitive decline
Source: PubMed Central journal article supplement (PMC9125851; doi:10.1186/s12974-022-02472-4), 2022-05-23
Supplement: 12974_2022_2472_MOESM1_ESM.pdf [file 12974_2022_2472_MOESM1_ESM.pdf]

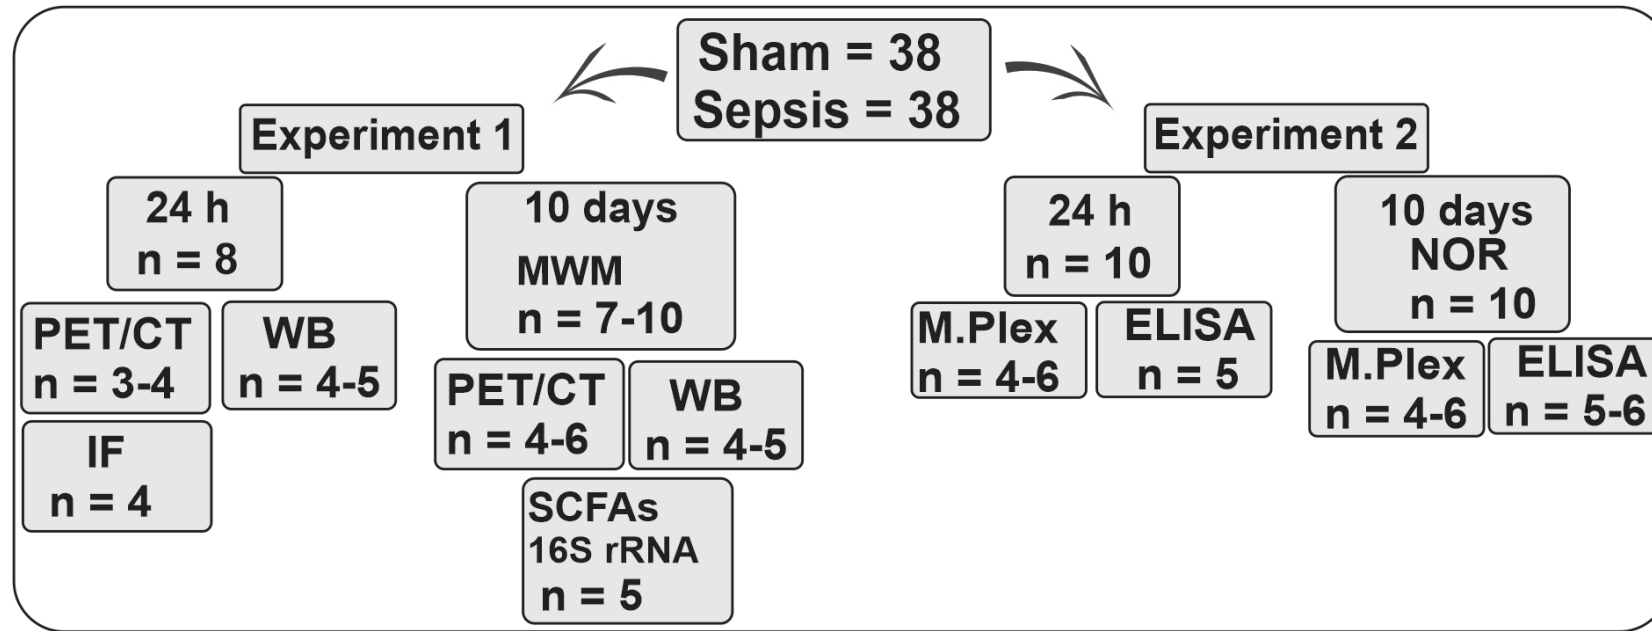

**Supplementary figure 1**

Flow chart of animal experiments: The number of rats used in behavioral tasks, PET/CT, and biochemical analysis.

| Days             | 1    | 2     | 3  | 4  | 5 | 6 | 7 | 8 | 9 | 10     |
|------------------|------|-------|----|----|---|---|---|---|---|--------|
| Sham<br>n = 18   | -    | -     | -  | -  | - | - | - | - | - | n = 18 |
| Sepsis<br>n = 30 | ☠☠☠  | ☠☠☠☠  | ☠☠ | ☠☠ | ☠ | - | - | - | - | n = 18 |
| Sham<br>n = 20   | -    | -     | -  | -  | - | - | - | - | - | n = 20 |
| Sepsis<br>n = 34 | ☠☠☠☠ | ☠☠☠☠☠ | ☠☠ | ☠☠ | ☠ | - | - | - | - | n = 20 |

**Supplementary figure 2**

Survival data: The mortality of rats until 10 days after CLP and non-CLP (sham) surgery. ☠ represents death of one rat.

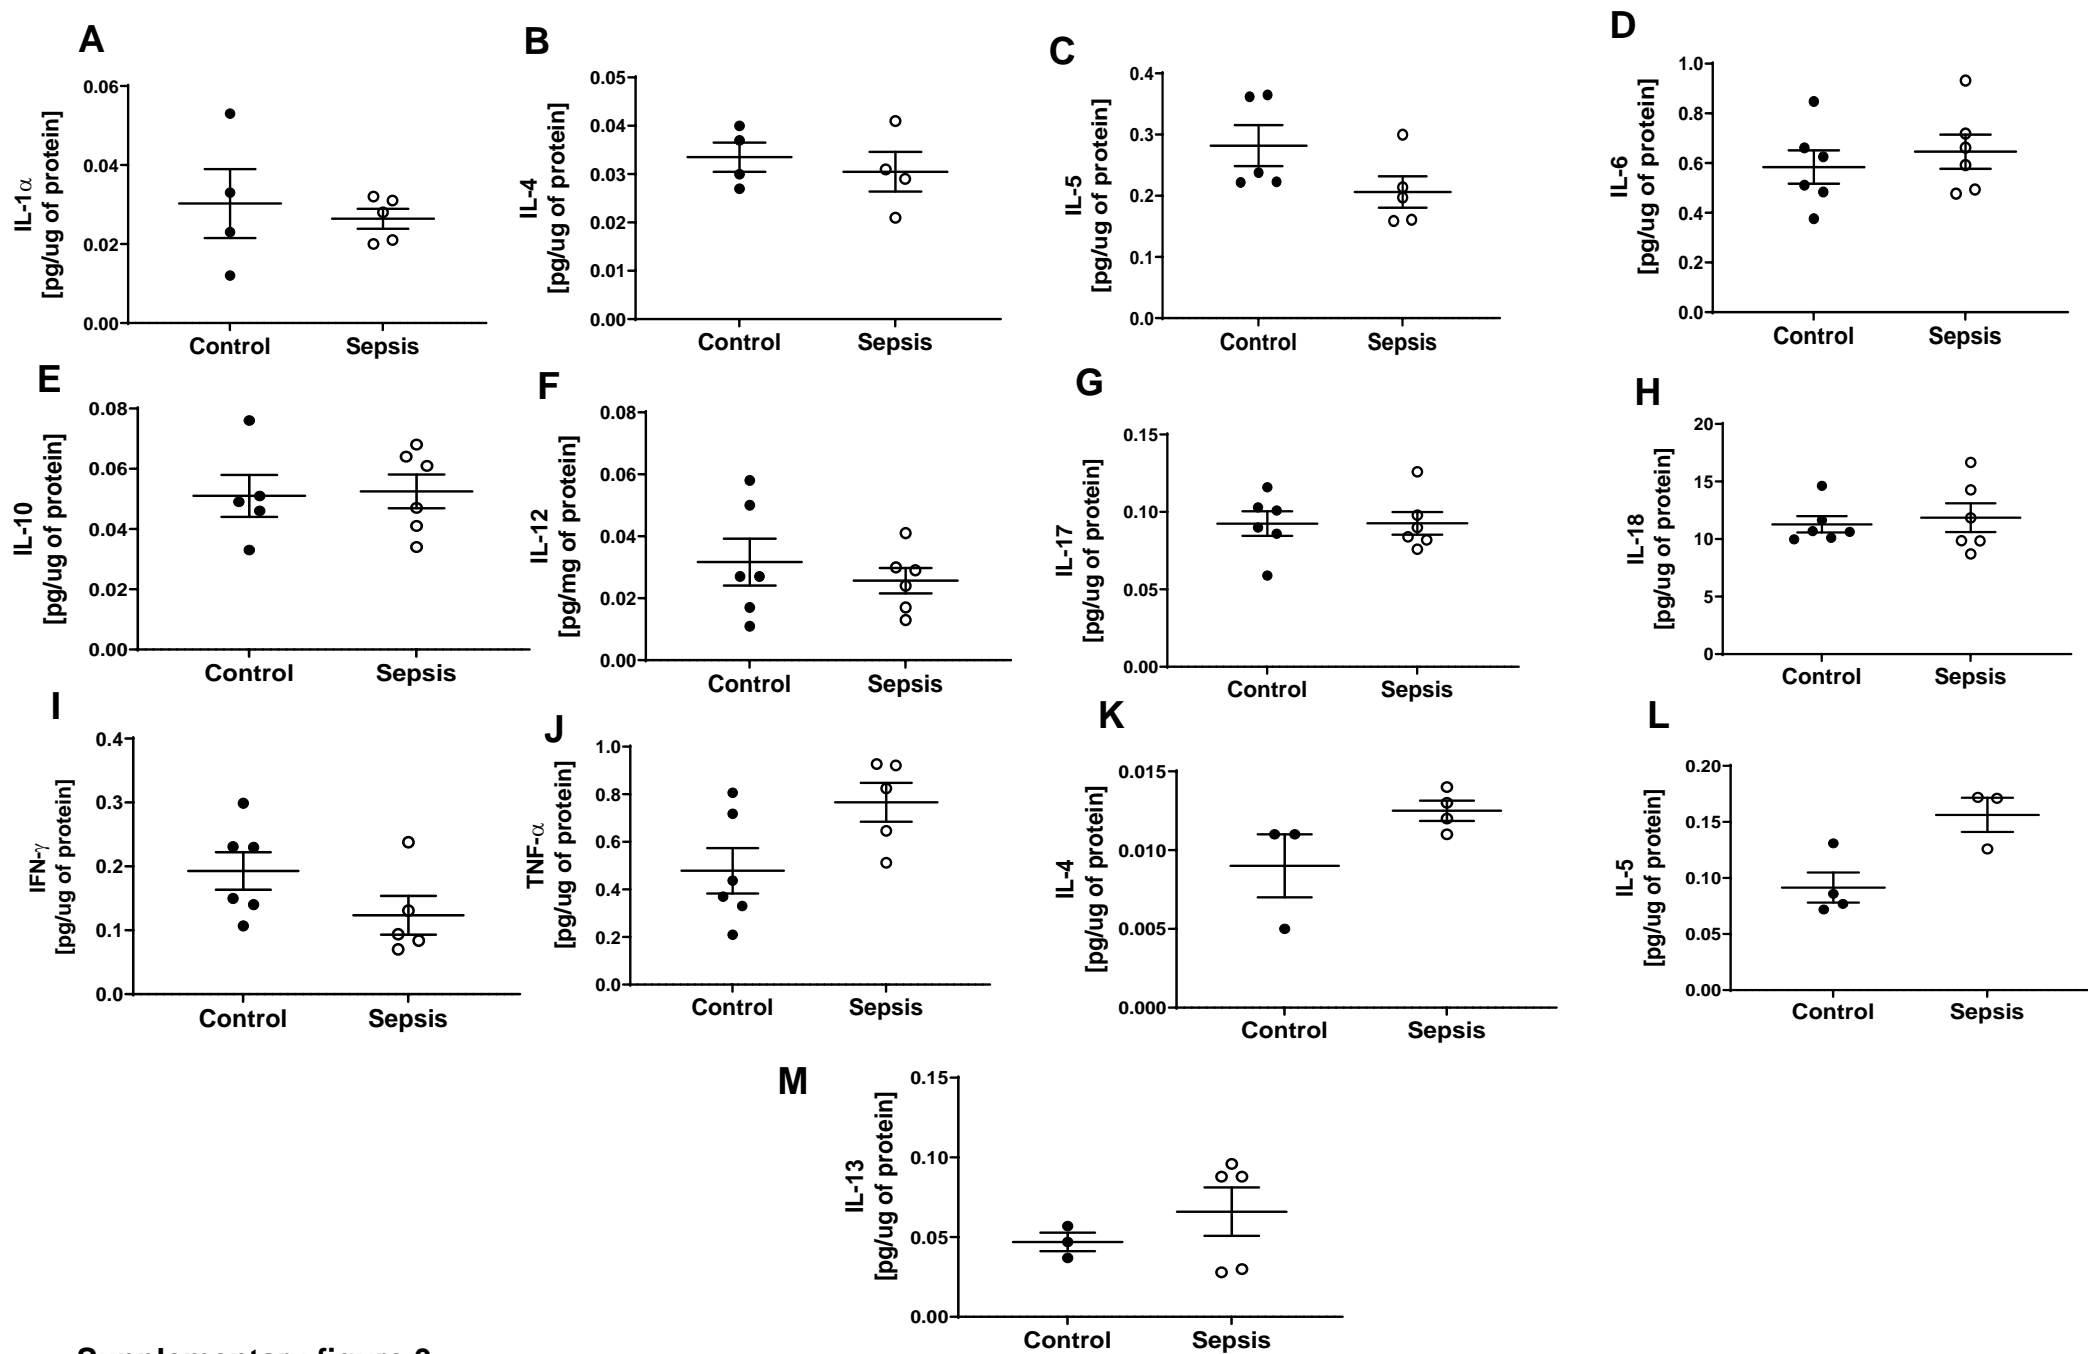

**Supplementary figure 3**

Cytokine levels: Cytokine levels measured using multi-plex analysis after 24 hours of CLP or non-CLP surgery at PFC (A-J) and hippocampus (K-M).

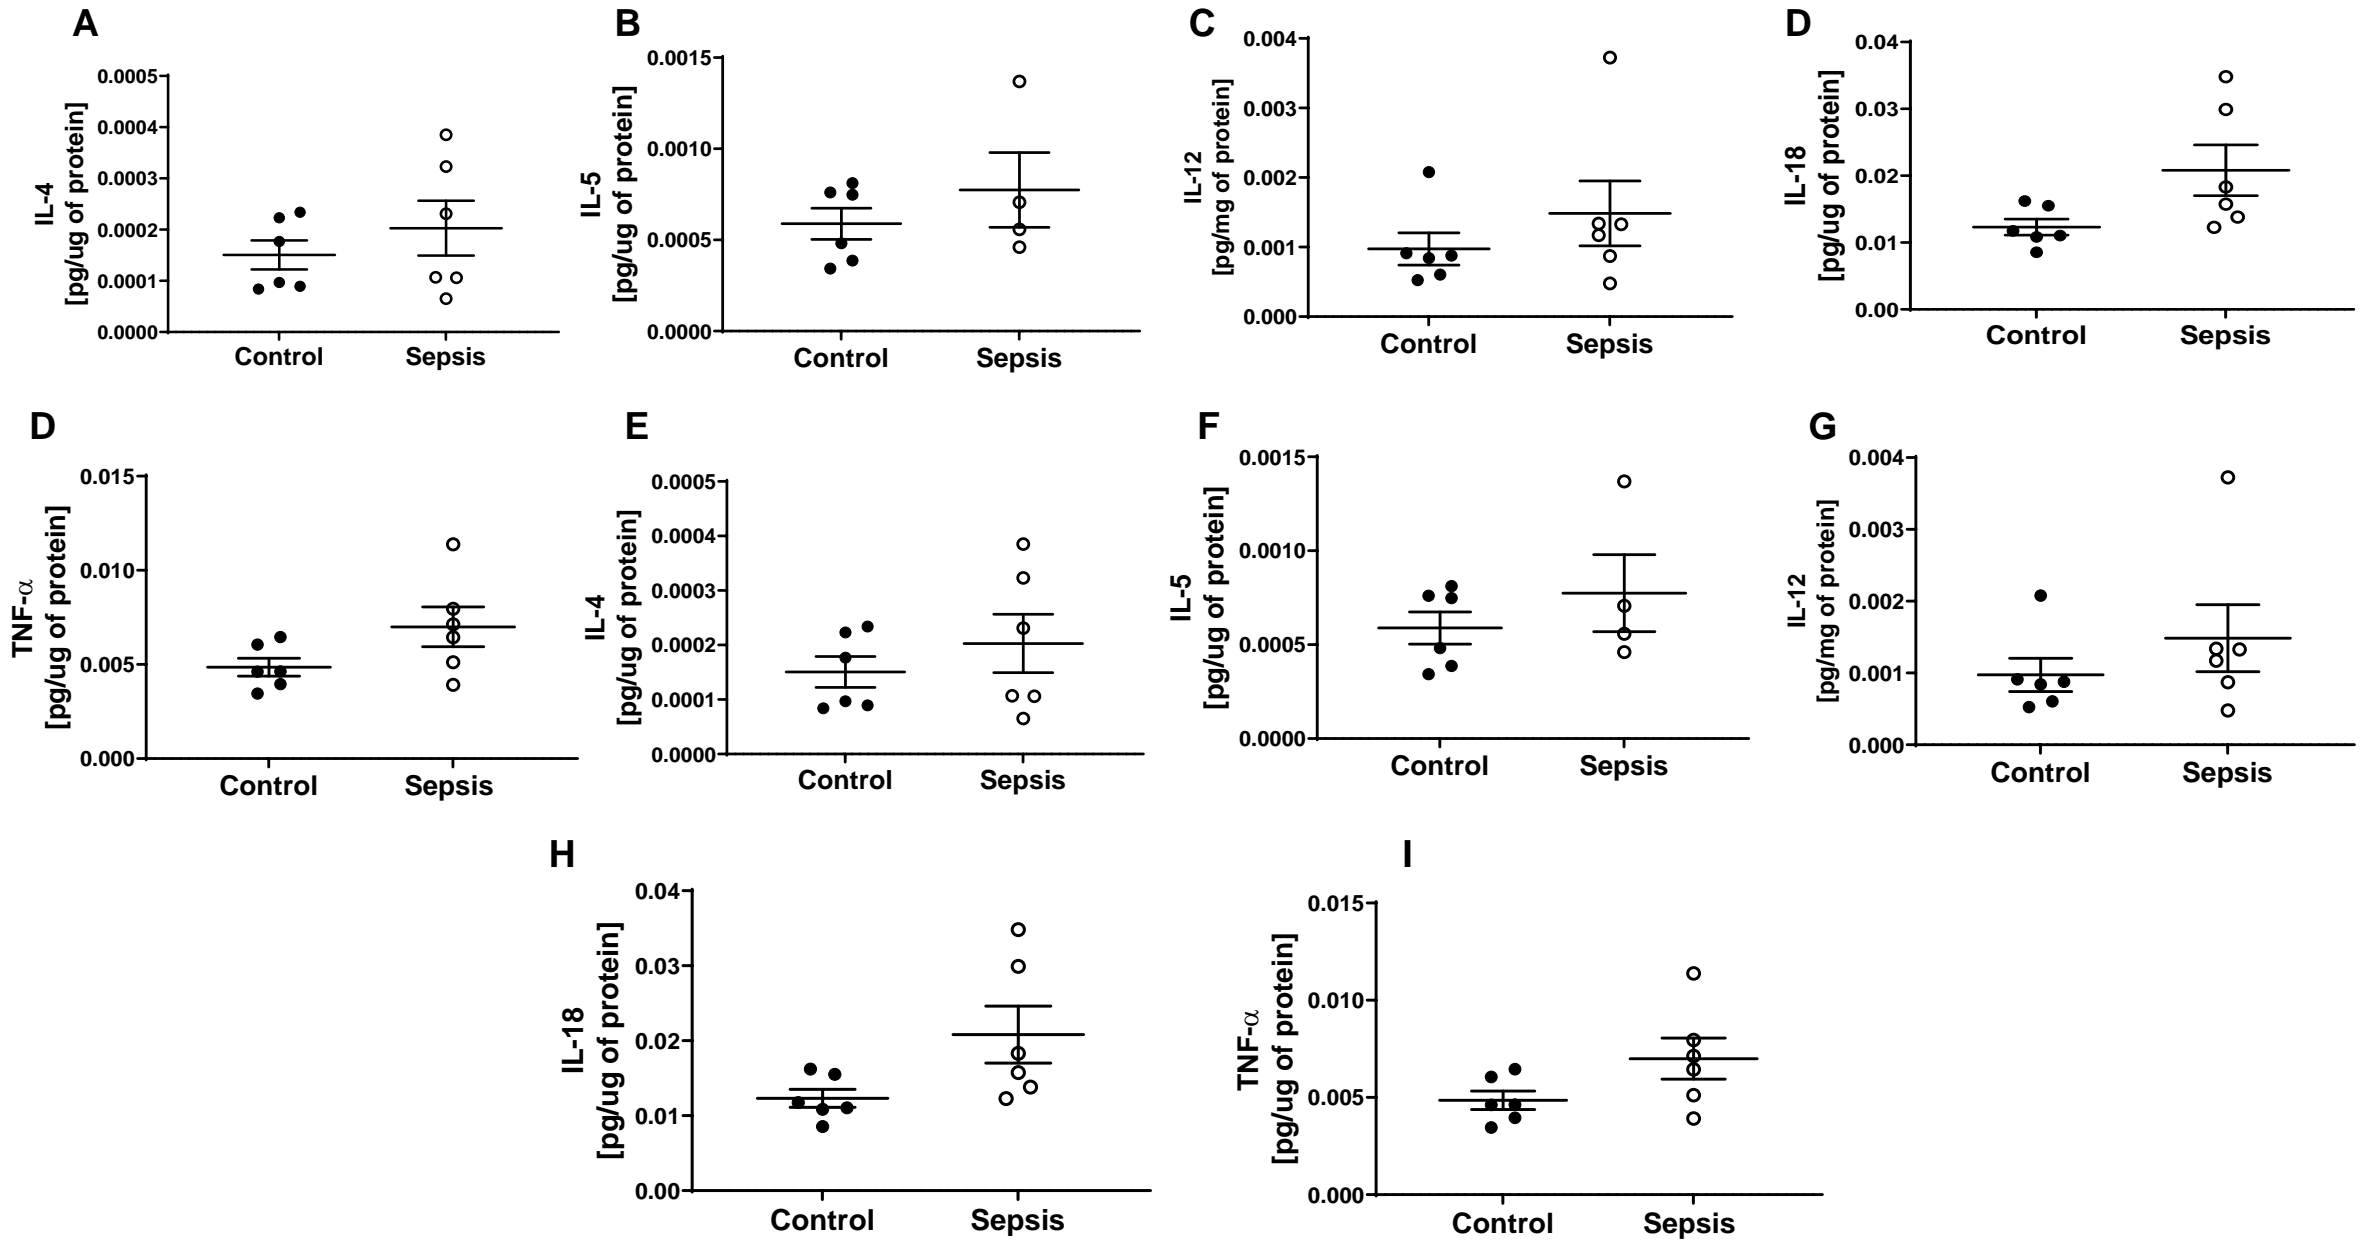

**Supplementary figure 4**

Cytokine levels: Cytokine levels measured using multi-plex analysis after 10 days of CLP or non-CLP surgery at PFC (A-D) and hippocampus (E-I).
